# Supplementary material for: Development of the Top Tips Habit-Based Weight Loss App and Preliminary Indications of Its Usage, Effectiveness, and Acceptability: Mixed-Methods Pilot Study
Source: PubMed Central journal article supplement (PMC6533874; doi:10.2196/12326), 2019-05-10
Supplement: mhealth_v7i5e12326_app1.pdf [file mhealth_v7i5e12326_app1.pdf]

## Top Tips app features

| <b>Feature</b>                                                                                      | <b>Details</b>                                                                                                                                                                                                                  |
|-----------------------------------------------------------------------------------------------------|---------------------------------------------------------------------------------------------------------------------------------------------------------------------------------------------------------------------------------|
| Information about the Top Tips, a shopping guide, and information about habits and being overweight | Allow users to read information about the 10 target behaviours (and an extra tip on dealing with tempting food in the Top Tips 'plus' app); handy hints for each tip; shopping guide; being overweight and; how to form habits. |
| Weekly plan of how to adopt the tips                                                                | Allow users to enter their own plans for each tip and edit them at any time as well as seeing examples of plans.                                                                                                                |
| Daily record of which tips have been achieved                                                       | Allow users to log their adherence to each tip every day.                                                                                                                                                                       |
| Daily record of weight                                                                              | Allow users to log their current weight in kg every day.                                                                                                                                                                        |
| Weekly review of progress                                                                           | Give automatic feedback on their weekly performance at adhering to the top tips.                                                                                                                                                |
| Daily notifications reminders                                                                       | Send daily notifications to increase engagement with the app.                                                                                                                                                                   |
| Tracking of individual data                                                                         | Provide users with individual passcodes in order to track their individual data.                                                                                                                                                |
