# Supplementary material for: Development of the Top Tips Habit-Based Weight Loss App and Preliminary Indications of Its Usage, Effectiveness, and Acceptability: Mixed-Methods Pilot Study
Source: PubMed Central journal article supplement (PMC6533874; doi:10.2196/12326), 2019-05-10
Supplement: mhealth_v7i5e12326_app2.pdf [file mhealth_v7i5e12326_app2.pdf]

## **ADDITIONAL ADVICE ON BREAKING HABITS**

### **Finding it difficult to resist tempting food?**

Strong desires to eat unhealthy foods, usually known as cravings only last for 15 to 30 minutes. If you have strategies of things to do or think when you have a craving, this can help you to resist unhealthy foods.

#### **You can opt to:**

##### **1. Do something else instead**

Make plans to distract yourself when you are craving or tempted by unhealthy foods. You can make a plan of doing something else, for example:

- When I'm craving for (food) I'll text a friend of mine or watch a music clip on YouTube.

##### **2. Think about something else instead**

You can also make a plan of thinking about your favourite (non-food) activity and focus on that as long as you can, for example:

- If I'm craving for (food), I'll image myself playing piano
