# Supplementary material for: Development of the Top Tips Habit-Based Weight Loss App and Preliminary Indications of Its Usage, Effectiveness, and Acceptability: Mixed-Methods Pilot Study
Source: PubMed Central journal article supplement (PMC6533874; doi:10.2196/12326), 2019-05-10
Supplement: mhealth_v7i5e12326_app3.pdf [file mhealth_v7i5e12326_app3.pdf]

Top Tips weight loss app 1 - Tutorial for the Top Tips 'only' app.

URL: <https://youtu.be/i0FyNq3te4E2017>.

Archived at <http://www.webcitation.org/75mj3QApG> on January 29th, 2019.
