# Supplementary material for: Development of the Top Tips Habit-Based Weight Loss App and Preliminary Indications of Its Usage, Effectiveness, and Acceptability: Mixed-Methods Pilot Study
Source: PubMed Central journal article supplement (PMC6533874; doi:10.2196/12326), 2019-05-10
Supplement: mhealth_v7i5e12326_app8.pdf [file mhealth_v7i5e12326_app8.pdf]

Preliminary indication of the effect of the Top Tips apps on weight loss and behaviours: sensitivity analysis

| Outcome                        | Top Tips only |             |            |                |                | Top Tips plus |            |            |                |                | Waiting list |            |            |                 |                | p <sup>^</sup> |
|--------------------------------|---------------|-------------|------------|----------------|----------------|---------------|------------|------------|----------------|----------------|--------------|------------|------------|-----------------|----------------|----------------|
|                                | N             | M (sd)      | M (sd)     | M (95%CI)      | d <sup>*</sup> | N             | M (sd)     | M (sd)     | M (95%CI)      | d <sup>*</sup> | N            | M (sd)     | M (sd)     | M (95%CI)       | d <sup>*</sup> |                |
| Self-regulation <sup>1</sup>   | 28            | 2.8(.57)    | 2.9(.71)   | .10(-.08;.29)  | .48            | 27            | 2.8(.62)   | 2.9(.62)   | .04(-.04;.13)  | .19            | 26           | 2.8(.51)   | 2.8(.43)   | -.01(-.11;.08)  | .04            | .439           |
| Weight in kg                   | 28            | 93.5 (15.4) | 92.4(14.6) | -1.1(-2.3;.09) | .35            | 27            | 93.1(19.5) | 92.3(20.2) | -.78(-1.8;.16) | .29            | 26           | 93.6(23.4) | 93.6(23.9) | -.004(-1.1;1.1) | .001           | .364           |
| Target Behaviours <sup>2</sup> | 28            | 3.0(.35)    | 3.1(.50)   | .12(-.00;.25)  | .38            | 27            | 3.2(.51)   | 3.3(.58)   | .09(.00;.16)   | .43            | 26           | 3.0(.45)   | 3.1(.48)   | .06(-.07;.20)   | .19            | .746           |
| F&V intake <sup>3</sup>        | 28            | 1.77(.87)   | 1.82(.90)  | .04(-.07;.16)  | .15            | 27            | 1.52(1.1)  | 1.64(1.1)  | .12(-.08;.33)  | .22            | 26           | 1.50(.71)  | 1.65(.81)  | .15(-.19;.49)   | .18            | .798           |
| SS intake <sup>4</sup>         | 28            | .63(.73)    | .62(.73)   | -.01(-.02;.00) | .19            | 27            | .65(.76)   | .56(.73)   | -.08(-.23;.06) | .23            | 26           | .47(.45)   | .34(.21)   | -.13(-.30;.04)  | .29            | .406           |
| SD intake <sup>5</sup>         | 28            | .17(.22)    | .16(.22)   | -.01(-.02;.00) | .28            | 27            | .16(.26)   | .12(.16)   | -.04(-.11;.03) | .21            | 26           | .17(.16)   | .15(.17)   | -.02(-.05;.01)  | .21            | .209           |
| Fat intake <sup>6</sup>        | 28            | 35.4(12.2)  | 34.7(12.7) | -.75(-2.1;.60) | .21            | 27            | 36.8(14.1) | 36.7(14.3) | -.03(-2.6;2.6) | .005           | 26           | 36.0(11.1) | 33.8(10.3) | -2.2(-4.9;.57)  | .32            | .397           |

**Note**=<sup>1</sup>Eating self-regulatory skills assessed using the Self-Regulation of Eating Behaviour Questionnaire, scores ranged from 1 (never) to 5 (always). <sup>2</sup>Overall mean score for the frequency of the 16 target behaviours, scores ranged from 1 (none of the time) to 5 (all of the time). <sup>3</sup>Fruit and vegetable intake in servings per day. <sup>4</sup>Daily occasions of sweet snacks intake. <sup>5</sup>Daily occasions of sugary sweetened drinks intake. <sup>6</sup>Score for the DINE questionnaire - Cut offs: <30 low fat; 30-40 medium fat; >40 high fat. Sensitivity analysis used the Last observation carried forward approach. M= mean. sd=Standard deviation. <sup>\*</sup>Cohen's d effect size. <sup>^</sup>p-value for analysis of variance (ANOVA). 95% Confidence Intervals.
